# Supplementary material for: Silver Nanoparticle Targets Fabricated Using Chemical Vapor Deposition Method for Differentiation of Bacteria Based on Lipidomic Profiles in Laser Desorption/Ionization Mass Spectrometry
Source: MDPI journal article supplement (doi:10.3390/antibiotics12050874), 2023-05-08
Supplement: s1 [file s1]

# Silver nanoparticles targets fabricated using chemical vapor deposition method for differentiation of bacteria based on lipidomic profiles in laser desorption/ionization mass spectrometry

Ewelina Maślak<sup>1</sup>, Adrian Arendowski<sup>1</sup>, Michał Złoch<sup>1,2\*</sup>, Justyna Walczak-Skierska<sup>1</sup>, Aleksandra Radtke<sup>3,4</sup>, Piotr Piszczek<sup>3,4</sup> and Paweł Pomastowski<sup>1</sup>

<sup>1</sup>Centre for Modern Interdisciplinary Technologies, Nicolaus Copernicus University in Toruń, Wileńska 4 Str., 87-100 Toruń, Poland

<sup>2</sup>Chair of Environmental Chemistry and Bioanalytics, Faculty of Chemistry, Nicolaus aCopernicus University in Toruń, Gagarina 7 Str., 87-100 Toruń, Poland

<sup>3</sup>Department of Inorganic and Coordination Chemistry, Faculty of Chemistry, Nicolaus Copernicus University in Toruń, Gagarina 7 Str., 87-100 Toruń, Poland

<sup>4</sup> Nano-implant Ltd., Gagarina 5/102, Toruń, Poland, 87-100

\*Correspondence: [michal.zloch@umk.pl](mailto:michal.zloch@umk.pl); Tel.: +48 56 665 60 60

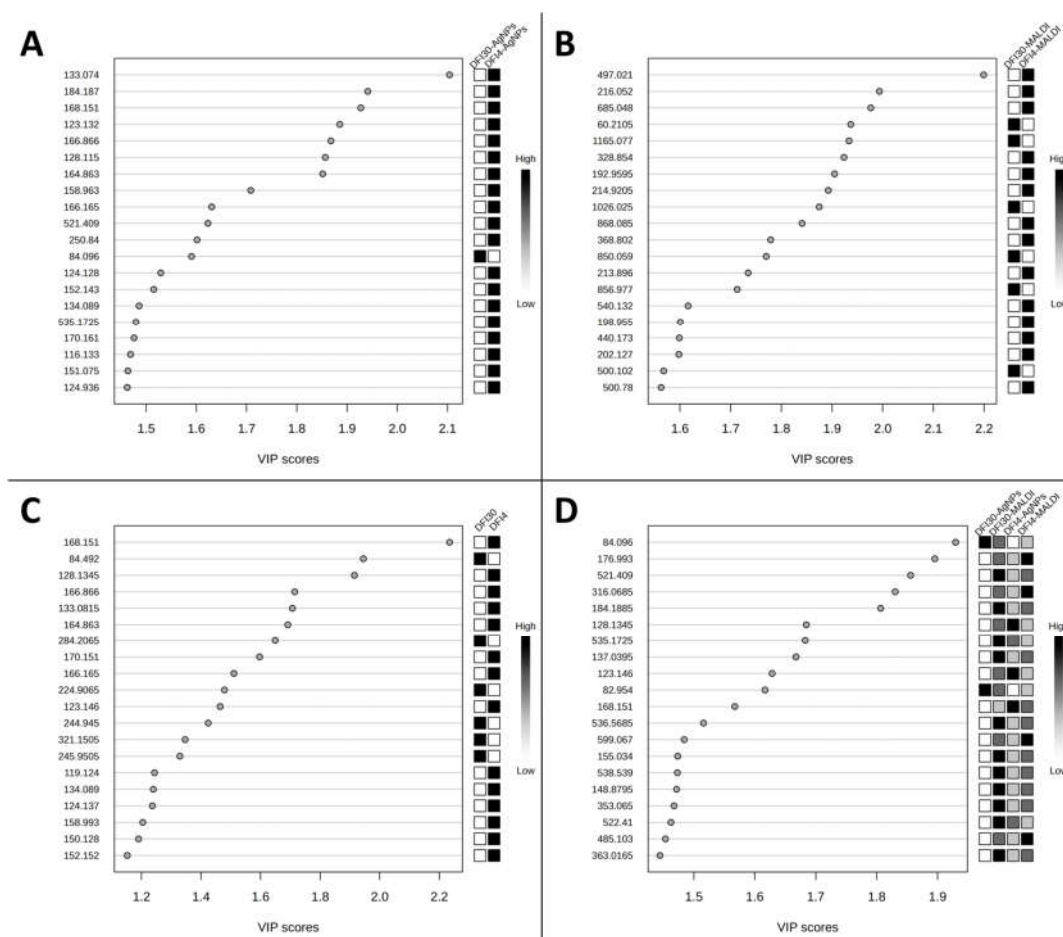

**Figure S1.** PLS-DA VIP scores for MS data from SALDI/NALDI (A), MALDI (B) experiments and with the use of two groups (C) and four groups (D) for all data.

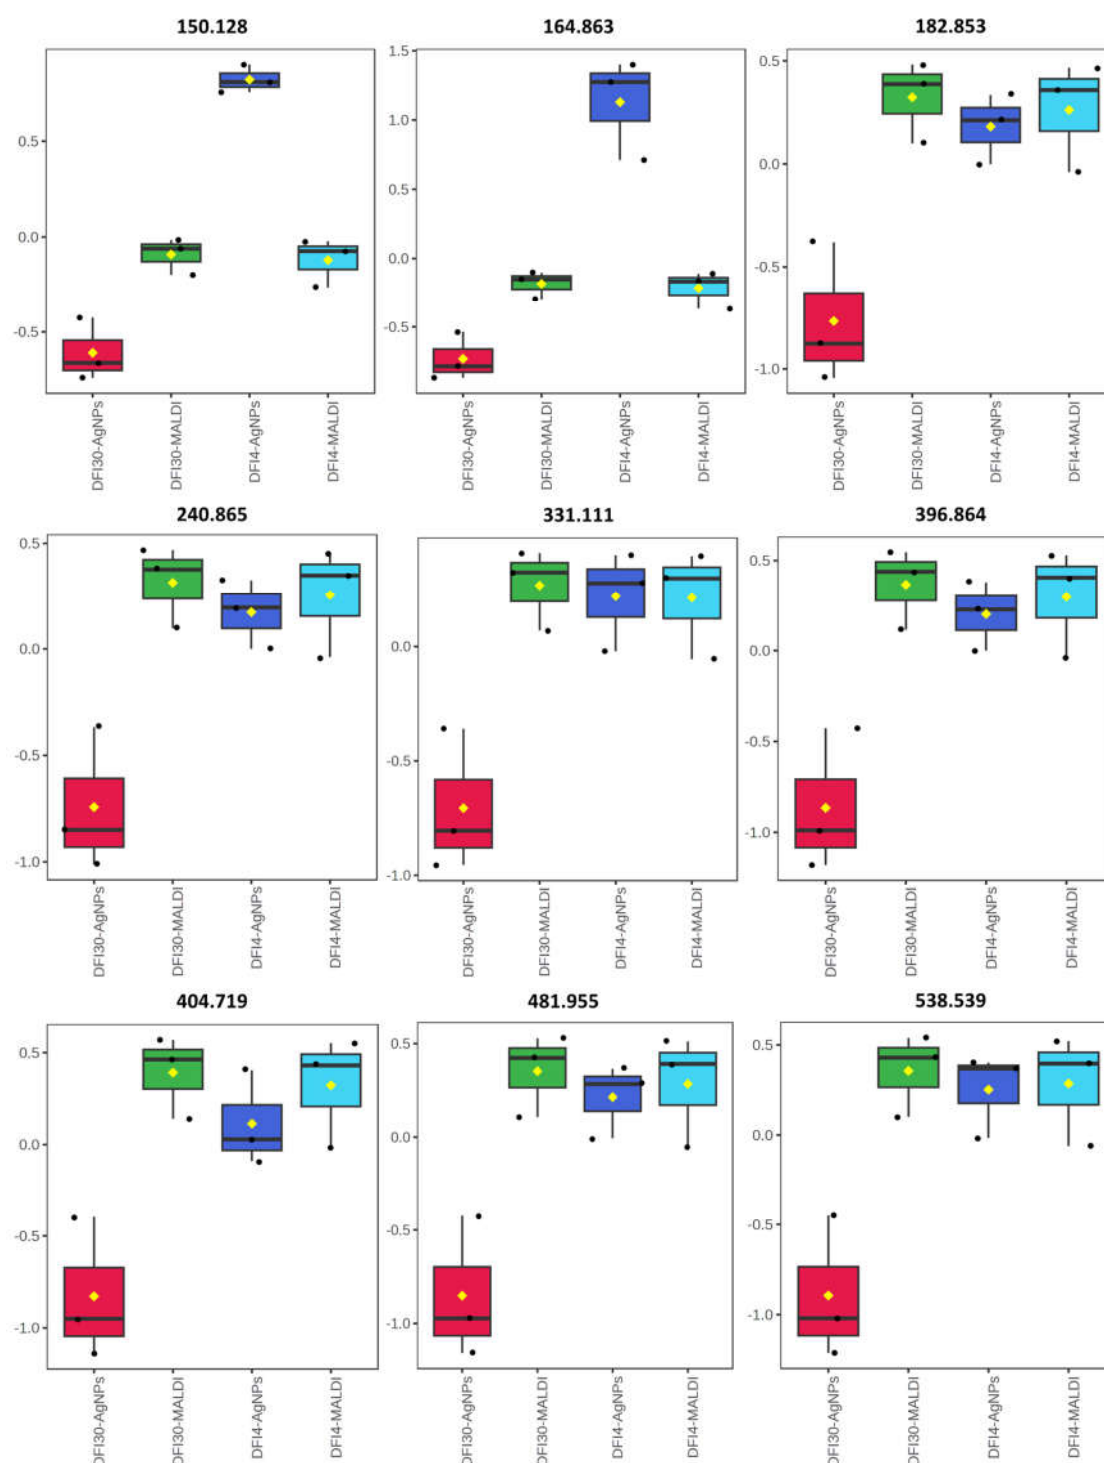

**Figure S2.** ANOVA box plots for the nine most discriminating  $m/z$  values obtained for DFI4 and DFI30 bacterial lipids samples with use SALDI and MALDI approach.

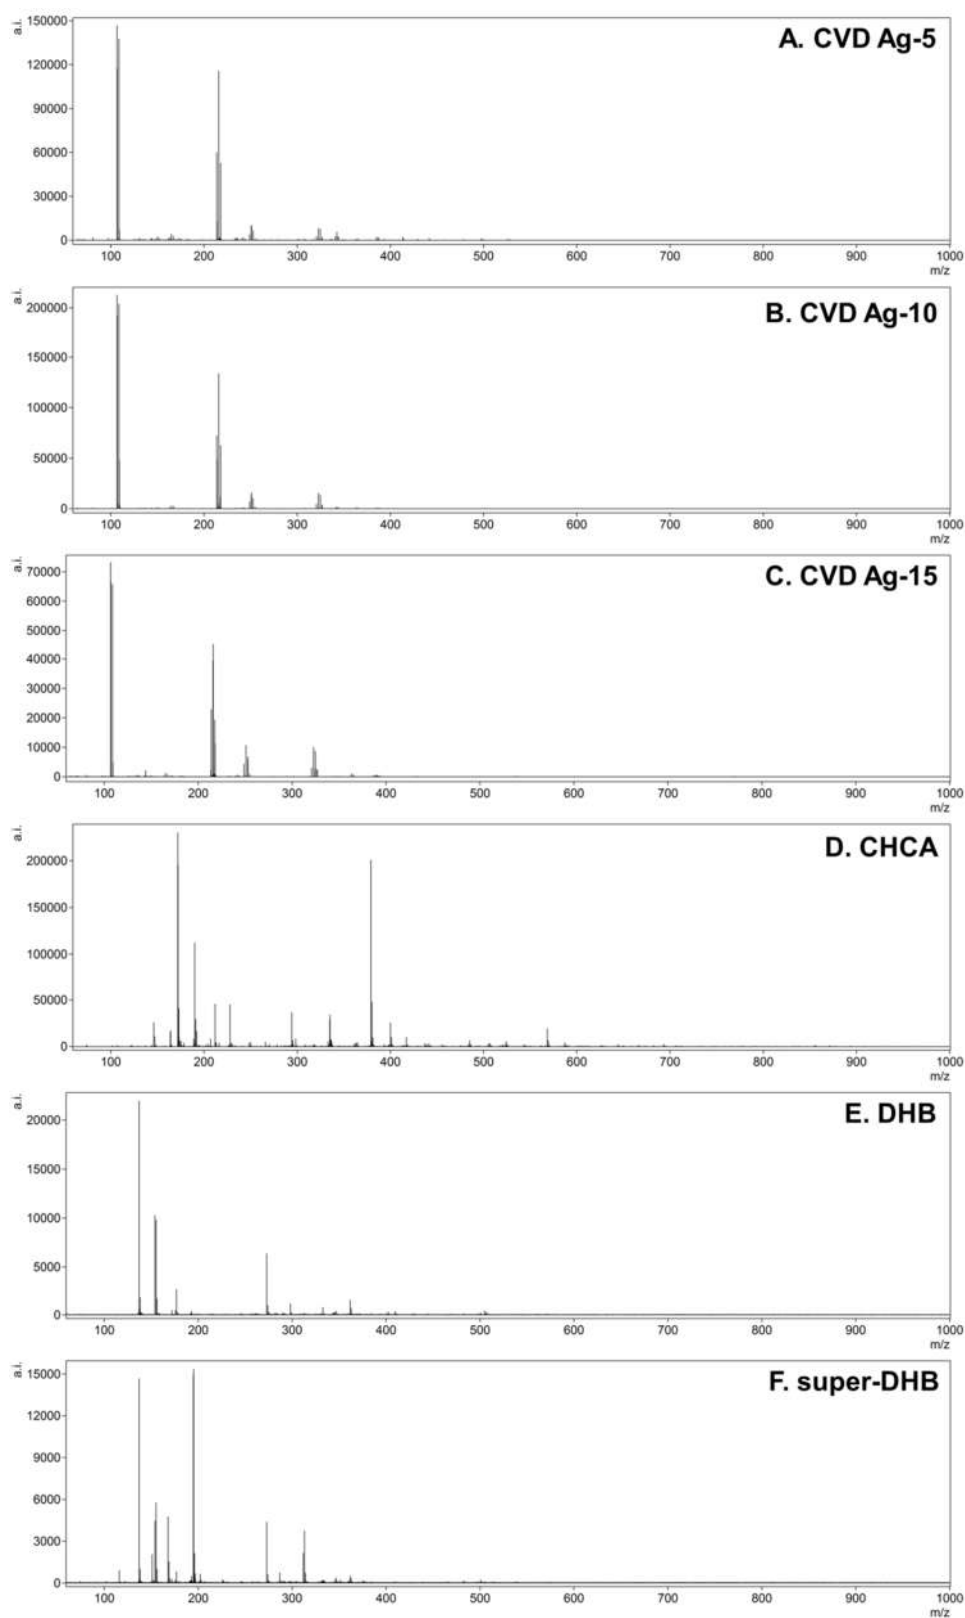

**Figure S3.** Overview of blank MS spectra performed for SALDI targets with CVD-applied silver nanostructures (A-C) and MALDI matrices (D-F).
